# Supplementary material for: Defining TP53 pioneering capabilities with competitive nucleosome binding assays
Source: HighWire-hosted journal article supplement (doi:10.1101/gr.234104.117), 2018-11-08
Supplement: Supplemental_Fig_S1.pdf [file Supplemental_Fig_S1.pdf]

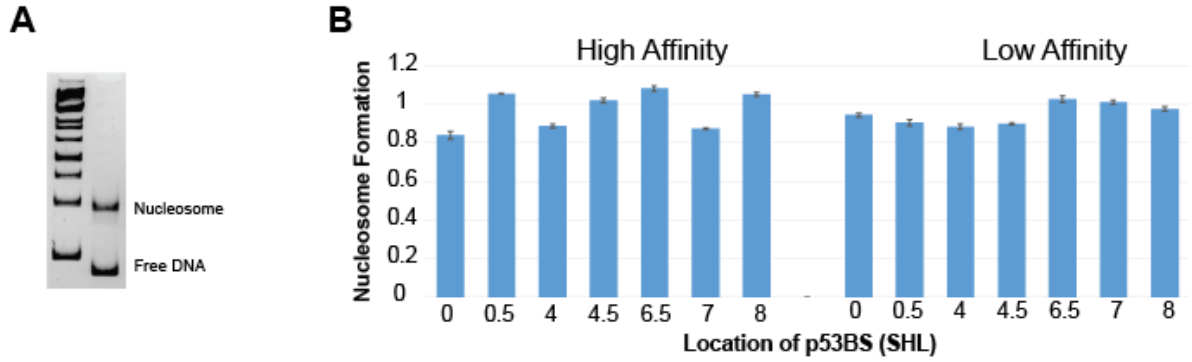

**Figure S1. Nucleosomes form efficiently at a single position.** (A) EMSA separating nucleosomes from free DNA before nucleosome purification. Only a single nucleosome band is present indicating a single nucleosome position on all templates after *in vitro* nucleosome reconstitution. (B) Nucleosome formation efficiency is determined by counting the frequency of each sequence within the nucleosomes compared to the total frequency of each sequence in both the free DNA and nucleosomes relative to formation for the control 601 sequence (see equation Supplemental methods). Nucleosome formation was determined for every single nucleosome template used in the experiment. Error bars are standard error of the mean for 4 replicate experiments.
